# Supplementary material
Source: publisher figshare collection journal article supplement (https://acs.figshare.com/ndownloader/files/3758113)
Supplement: Supplementary file 1 [file 3758113]

## Supporting Information

### **Cleavable Ligands Enable Uniform Close Packing in Colloidal Quantum Dot Solids**

*Graham H. Carey, Mingjian Yuan, Riccardo Comin, Oleksandr Voznyy, Edward H. Sargent\**

The Edward S. Rogers Department of Electrical and Computer Engineering

University of Toronto

10 King's College Road

Toronto, Ontario, M5S 3G4, Canada

\*ted.sargent@utoronto.ca

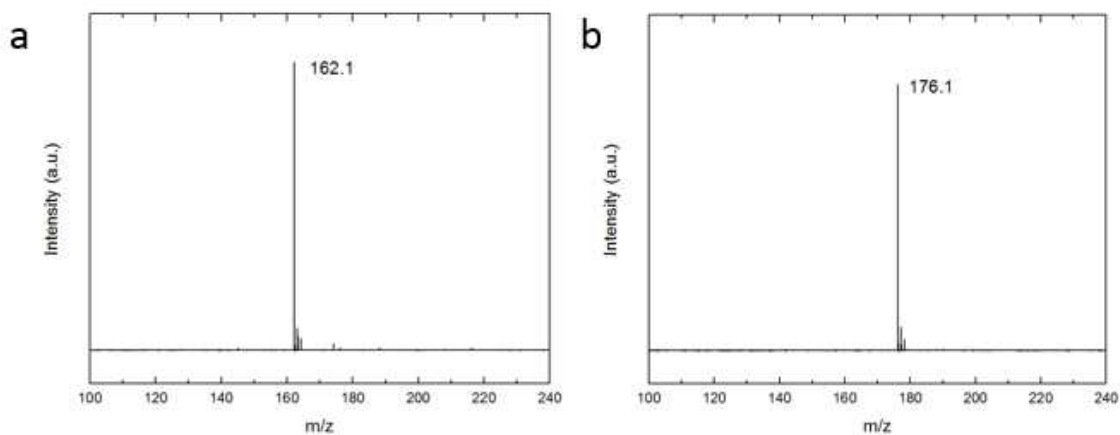

**Figure S1. Ligand synthesis.** Mass spectra for thioamide synthesized with (a) butylamine (3MN4P) and (b) pentylamine (3MN5P). Expected peaks are found at  $m/z$  162.1 and 176.1, respectively, with minimal evidence of by-products present.

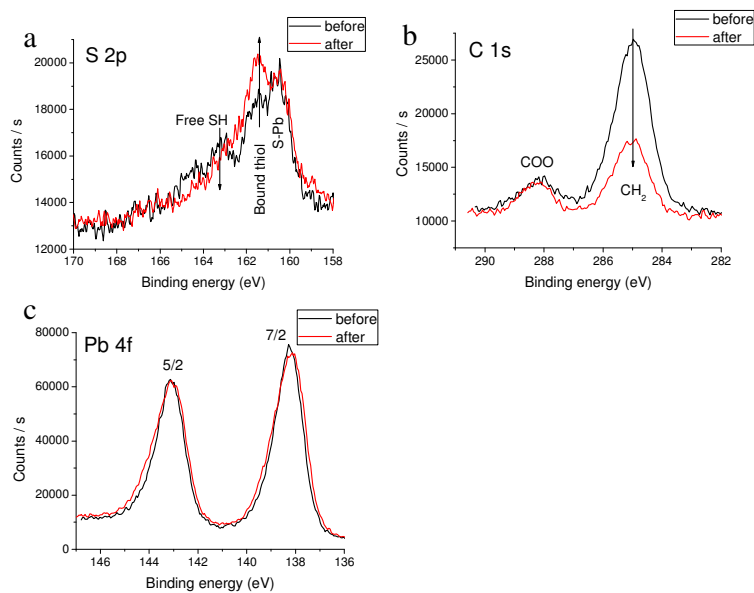

**Figure S2. XPS spectra before and after cleaving.** Signals for (a) sulfur, (b) carbon and (c) lead are shown. No change is observed in bulk Pb-S signals, while a slight increase in bound thiol is observed, along with a decrease in  $\text{CH}_2$  signal.
